# Supplementary material for: Genome Wide Identification and Expression Profiling Indicate Expansion of Family I84 Protease Inhibitor via Gene Tandem Duplication and Divergence in Razor Clam Sinonovacula constricta
Source: Front Immunol. 2022 Jun 1;13:907274. doi: 10.3389/fimmu.2022.907274 (PMC9198434; doi:10.3389/fimmu.2022.907274)
Supplement: Supplementary file 3 [file Table_1.xlsx]

## Sheet: Sheet1
Primer	Sequence(5' to 3')
scSI-3F	ATGAAGGCTTCCCTAGCAGTCCTG
scSI-3R	TCAGTGGTGTTGTTTAATGCAATC
scSI-4F	ATGAAGGCTTCCCTAGCAGTCCTG
scSI-4R	TCAGCGGCGTTATTTAACGCAATT
scSI-5F	ATGAAAGTGTGCCTAGCTTTTGTT
scSI-5R	TCACTTCTGACATGTGCAAAATCC
scSI-6F	ATGAAGTCGACCATCCTCCTGATC
scSI-6R	CTATGCATGCGCACAGTGGCACTC
scSI-7F	ATGTCACATTTACATTTACCCTGT
scSI-7R	TTACTTTCCACCGATTTGGTTAAA
scSI-8F	ATGAACGCCTTGTTTCTGGTCGTC
scSI-8R	TTACTTTCCCCCGTTCTGGTTTTG
scSI-9F	ATGAACGCTCTTAGTCTGGCTGTA
scSI-9R	TTACTTTCCACCGCCTGGGAACAT
scSI-10F	ATGAACACACTGTGTCTGGTTGTA
scSI-10R	TTACTTTCCACCGCCTGGGAACAT
scSI-11F	ATGAAACTGTTGTGTTTGGTTGTT
scSI-11R	CTATTTACCAATTCCACCGATGCC
scSI-12F	ATGAAACTGCTCTGCTGTGCTATT
scSI-12R	CTATTTTCCGATGCCTCCAATGGA
scSI-13F	ATGAAAGTCGCTATTGCGTTCATC
scSI-13R	TTATCGGCCACCGTTGAATCCAAA
scSI-14F	ATGAAAGTCGCTCATGCACTTCTT
scSI-14R	TTATCGACCACCGTTGAATCCACA
