# Supplementary material for: Genome Wide Identification and Expression Profiling Indicate Expansion of Family I84 Protease Inhibitor via Gene Tandem Duplication and Divergence in Razor Clam Sinonovacula constricta
Source: Front Immunol. 2022 Jun 1;13:907274. doi: 10.3389/fimmu.2022.907274 (PMC9198434; doi:10.3389/fimmu.2022.907274)
Supplement: Supplementary file 4 [file Table_2.xlsx]

## Sheet: Sheet1
SRA accession	Group	Description
SRX9989266	G2_1	Gill（32℃）
SRX9989267	G2_2	Gill（32℃）
SRX9989268	G2_3	Gill（32℃）
SRX9989261	G1_1	Gill（Control,22℃）
SRX9989262	G1_2	Gill（Control,22℃）
SRX9989265	G1_3	Gill（Control,22℃）
SRX9989272	D2_1	Digestive gland（32℃）
SRX9989263	D2_2	Digestive gland（32℃）
SRX9989264	D2_3	Digestive gland（32℃）
SRX9989269	D1_1	Digestive gland（Control,22℃）
SRX9989270	D1_2	Digestive gland（Control,22℃）
SRX9989271	D1_3	Digestive gland（Control,22℃）
SRX6692226	G3_1	Gill（Control,0mg/L）
SRX6692225	G3_2	Gill（Control,0mg/L）
SRX6692228	G3_3	Gill（Control,0mg/L）
SRX6692232	G4_1	Gill（180mg/L）
SRX6692231	G4_2	Gill（180mg/L）
SRX6692224	G4_3	Gill（180mg/L）
SRX6692227	D3_1	Digestive gland（Control,0mg/L）
SRX6692229	D3_2	Digestive gland（Control,0mg/L）
SRX6692230	D3_3	Digestive gland（Control,0mg/L）
SRX6692223	D4_1	Digestive gland（180mg/L）
SRX6692233	D4_2	Digestive gland（180mg/L）
SRX6692234	D4_3	Digestive gland（180mg/L）
SRX6829389	D-E1	Egg
SRX6829390	D-E2	Egg
SRX6829393	D-F1	Four cells
SRX6829394	D-B1	Blastulae
SRX6829395	D-B2	Blastulae
SRX6829396	D-G1	Gastrulae
SRX6829397	D-G2	Gastrulae
SRX6829398	D-T1	Trochophore
SRX6829399	D-T2	Trochophore
SRX6829400	D-D1	D-stage larvae
SRX6829391	D-U1	Umbo larvae
SRX6829392	D-J1	Juvenile
SRX5649324	R6	survived after fifteen days
SRX5649325	R5	survived after fifteen days
SRX5649326	R4	survived after fifteen days
SRX5649327	R3	survived after fifteen days
SRX5649328	R2	survived after fifteen days
SRX5649329	R12	survived after fifteen days
SRX5649330	R11	survived after fifteen days
SRX5649331	R10	survived after fifteen days
SRX5649332	R9	survived after fifteen days
SRX5649333	R8	survived after fifteen days
SRX5649334	S1	died in the fourth day
SRX5649335	S10	died in the third day
SRX5649336	S15	died in the second day
SRX5649337	S9	died in the first day
SRX5649338	S8	died in the seventh day
SRX5649339	S7	died in the sixth day
SRX5649340	S6	died in the sixth day
SRX5649341	S5	died in the fifth day
SRX5649342	S4	died in the ninth day
SRX5649343	S14	died in the eighth day
SRX5649344	R15	survived after fifteen days
SRX5649345	R14	survived after fifteen days
SRX5649346	R13	survived after fifteen days
SRX5649347	S13	died in the thirteenth day
SRX5649348	S3	died in the twenlfth day
SRX5649349	S2	died in the twenlfth day
SRX5649350	S12	died in the eleventh day
SRX5649351	S11	died in the tenth day
SRX5649352	R7	survived after fifteen days
SRX5649353	R1	survived after fifteen days
