# Supplementary material for: Genome Wide Identification and Expression Profiling Indicate Expansion of Family I84 Protease Inhibitor via Gene Tandem Duplication and Divergence in Razor Clam Sinonovacula constricta
Source: Front Immunol. 2022 Jun 1;13:907274. doi: 10.3389/fimmu.2022.907274 (PMC9198434; doi:10.3389/fimmu.2022.907274)
Supplement: Supplementary file 5 [file Table_3.xlsx]

## Sheet: Sheet1
		scSI-2	scSI-7	scSI-8	scSI-9	scSI-10	scSI-11	scSI-12	scSI-13	scSI-1	scSI-3	scSI-4	scSI-5	scSI-6
	scSI-2	100
	scSI-7	47.76	100
	scSI-8	49.28	80.6	100
	scSI-9	56.52	65.67	69.57	100
	scSI-10	56.52	68.66	72.46	97.1	100
	scSI-11	51.47	37.31	37.31	41.79	41.79	100
	scSI-12	66.18	51.52	55.88	55.88	57.35	47.06	100
	scSI-13	34.33	37.31	35.82	34.33	34.33	30.43	32.35	100
	scSI-1	33.93	28.57	30.36	32.14	32.14	25.86	27.12	32.26	100
	scSI-3	25.86	24.14	25.86	25.86	27.59	25	24.59	28.12	46.58	100
	scSI-4	25.45	25.45	27.27	27.27	29.09	26.32	24.14	29.51	45.83	87.21	100
	scSI-5	32.08	35.85	33.96	33.96	33.96	29.09	30.36	32.2	54.29	37.14	37.14	100
	scSI-6	26.79	28.57	30.36	26.79	26.79	31.03	30.51	25.81	39.44	37.14	33.33	38.24	100
