# Supplementary material for: Genome Wide Identification and Expression Profiling Indicate Expansion of Family I84 Protease Inhibitor via Gene Tandem Duplication and Divergence in Razor Clam Sinonovacula constricta
Source: Front Immunol. 2022 Jun 1;13:907274. doi: 10.3389/fimmu.2022.907274 (PMC9198434; doi:10.3389/fimmu.2022.907274)
Supplement: Supplementary file 7 [file Table_5.xlsx]

## Sheet: Sheet1
	scSI-1	scSI-3	scSI-4	scSI-5	scSI-6	scSI-2	scSI-7	scSI-8	scSI-9	scSI-10	scSI-11	scSI-12	scSI-13	scSI-14
scSI-1	100
scSI-3	30.67	100
scSI-4	31.03	51.28	100
scSI-5	46.93	30.75	32.32	100
scSI-6	32.42	32.49	31.01	30.99	100
scSI-2	35.03	34.81	35.89	34.47	38.84	100
scSI-7	34.85	35.79	33.97	34.25	37.15	38.1	100
scSI-8	33.12	32.48	33.49	33.59	37.94	40.05	43.43	100
scSI-9	35.46	33.71	35.09	33.74	39.04	40.09	43.35	40.98	100
scSI-10	34.07	34.14	36.4	33.31	39.63	39.26	42.36	42.29	51.73	100
scSI-11	33.99	31.27	32.48	35.8	37.85	37.35	38.59	36.61	38.16	37.82	100
scSI-12	31.75	41.18	43.39	31.5	31.27	34.66	32.64	31.62	32.06	35.01	31.64	100
scSI-13	32.07	32.33	31.64	32.88	37.41	37.39	36.96	35.86	37.44	38.93	36.16	31.65	100
scSI-14	29.6	37.78	39.32	31.17	30.61	30.76	32.46	32.74	32.06	29.32	32.78	37.07	31.8	100
